# Supplementary material
Source: PubMed Central journal article supplement (PMC8898331)
Supplement: NIHMS972572-supplement-supplemental_file.pdf [file NIHMS972572-supplement-supplemental_file.pdf]

## Electronic Supplementary Information (ESI)

# One-step Facile Synthesis of Highly Magnetic and Surface Functionalized Iron Oxide

## Nanorods for Biomarker Targeted Applications

Anamaria Orza,<sup>†,‡</sup> Hui Wu,<sup>†,‡</sup> Yaolin Xu,<sup>†,‡</sup> Qiong Lu<sup>†,§</sup> and Hui Mao<sup>†,‡,\*</sup>

<sup>†</sup>Department of Radiology and Imaging Sciences, Emory University School of Medicine  
Atlanta, Georgia, The United States of America.

<sup>‡</sup>Center for Systems Imaging, Emory University School of Medicine, Atlanta, Georgia,  
The United States of America

<sup>§</sup>Department of Pharmacy, The Second Xiangya Hospital of Central South University,  
Changsha, Hunan, China

Corresponding Author: Hui Mao, E-mail: [hmao@emory.edu](mailto:hmao@emory.edu).

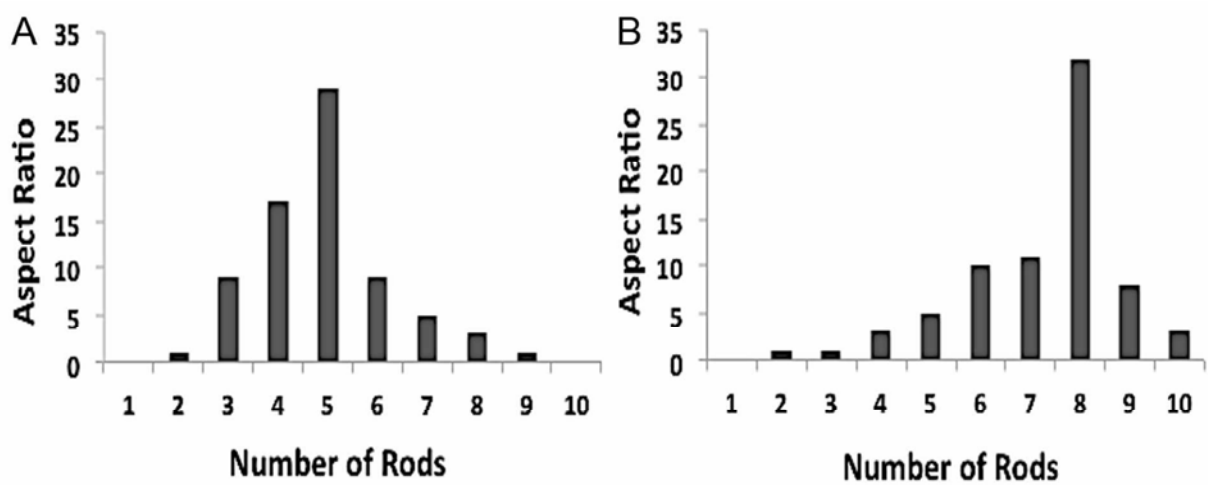

**Figure S1.** The statistical analysis of the aspect ratio of synthesized, oleylamine-coated (A) 25 nm (in length with a mean length of  $25.4 \pm 1.9$  nm) and (B) 50 nm (in length with mean length of  $50 \pm 3.2$  nm) IONRs, respectively.

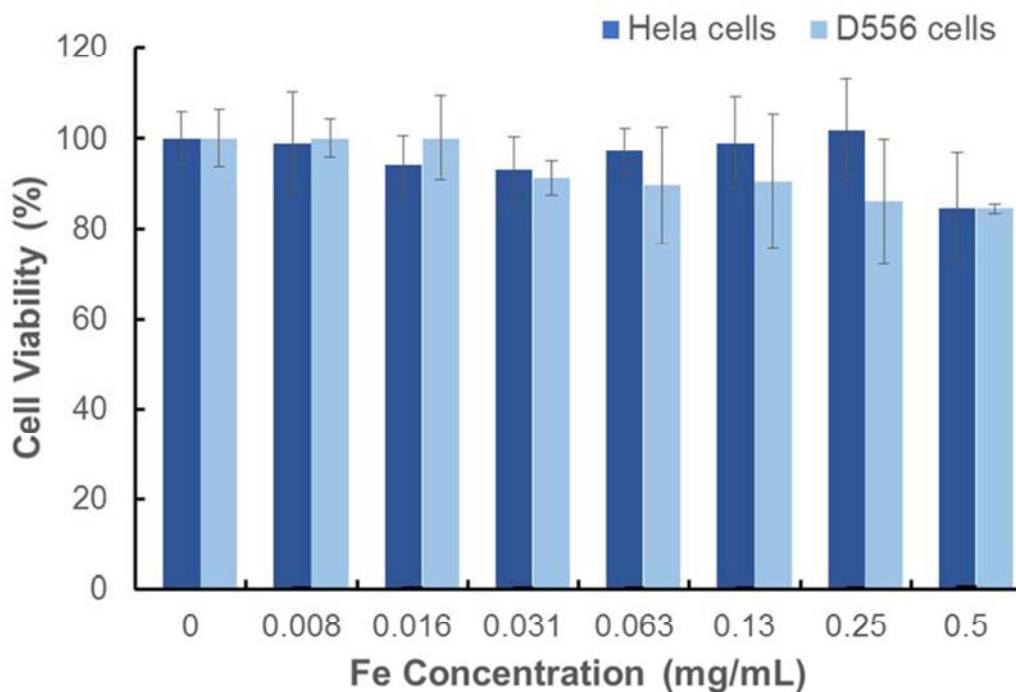

**Figure S2.** The cytotoxicity tests (MTT assay used) of IONRs after 24 hour incubation with HeLa cells and D556 cells. Cell viability was estimated using the MTT conversion test using a total of  $10^4$  HeLa cells or D556 cells, respectively, with IONRs in the concentration range of 0.008-0.5 Fe mg/mL). Absorbance at 570 nm was measured on a plate reader. Readings from 6 wells were averaged, and 100% viability was determined for untreated cells. Comparisons of the cell viability with different Fe concentrations with control were performed using one-way analysis of variance and the student t test (unpaired, two tails).
